# Supplementary material for: Evoking dynamic Fe–Nx active sites through the immobilization of molecular Fe catalysts on N-doped graphene quantum dots for the efficient electroreduction of nitrate to ammonia
Source: Royal Society of Chemistry journal article supplement (doi:10.1039/d4ta03246b), 2024-01-01
Supplement: d4ta03246b1.pdf [file d4ta03246b1.pdf]

## Supplementary Information

### Evoking the Dynamic Fe-N<sub>x</sub> Active Sites through the Immobilization of Molecular Fe Catalyst on NGQDs for the Efficient Electroreduction of Nitrate to Ammonia

Mia Rinawati<sup>1</sup>, Yen-Shuo Chiu<sup>1</sup>, Ling-Yu Chang<sup>1</sup>, Chia-Yu Chang<sup>2</sup>, Wei-Nien Su<sup>2,3</sup>, Ni Luh Wulan Septiani<sup>3,4</sup>, Brian Yulianto<sup>4</sup>, Wei-Hsiang Huang<sup>5</sup>, Jeng-Lung Chen<sup>5</sup>, and Min-Hsin Yeh<sup>1,3\*</sup>

<sup>1</sup> Department of Chemical Engineering, National Taiwan University of Science and Technology, Taipei 10607, Taiwan

<sup>2</sup> National Synchrotron Radiation Research Center, Hsinchu, 30076, Taiwan

<sup>3</sup> Research Center for Nanotechnology Systems, National Research and Innovation Agency (BRIN), Kawasan Puspiptek, Serpong, South Tangerang 15314, Indonesia

<sup>4</sup> Advanced Functional Materials Laboratory, Department of Engineering Physics, Institute of Technology Bandung (ITB), B233andung, 40132, Indonesia

<sup>5</sup> National Synchrotron Radiation Research Center, Hsinchu 30076, Taiwan

\*Corresponding author: Tel.: +886-2-2737-6643; E-mail: [mhyeh@mail.ntust.edu.tw](mailto:mhyeh@mail.ntust.edu.tw)

**Table S1** Atomic composition of NGQDs and NGQDs-Fe

| <b>Electrocatalysts</b> | <b>XPS atomic composition (%)</b> |          |          |           |
|-------------------------|-----------------------------------|----------|----------|-----------|
|                         | <b>C</b>                          | <b>O</b> | <b>N</b> | <b>Fe</b> |
| NGQDs                   | 38.7                              | 57.9     | 3.4      | -         |
| NGQDs-Fe (0.1 M)        | 45.9                              | 49.3     | 3.9      | 0.9       |
| NGQDs-Fe (0.25 M)       | 46.6                              | 48.2     | 4.8      | 0.4       |

**Table S2** XPS atomic composition of the nitrogen-optimized NGQDs-Fe.

| Electrocatalysts | XPS atomic composition (%) |      |     |     |
|------------------|----------------------------|------|-----|-----|
|                  | C                          | O    | Fe  | N   |
| N3-Fe            | 46.4                       | 48.6 | 1.7 | 4.3 |
| N5-Fe            | 51.4                       | 41.3 | 1.2 | 6.1 |
| N8-Fe            | 45.9                       | 49.3 | 0.9 | 3.9 |
| N10-Fe           | 48.8                       | 46.7 | 1.1 | 3.4 |

**Table S3** Nitrogen atomic composition of the optimized NGQDs-Fe

| Electrocatalysts | N atomic composition (%) |                   |            |             |
|------------------|--------------------------|-------------------|------------|-------------|
|                  | Pyridinic N              | Fe-N <sub>x</sub> | Pyrrolic N | Graphitic N |
| N3-Fe            | 20.1                     | 26.0              | 28.5       | 25.4        |
| N5-Fe            | 18.9                     | 26.8              | 30.7       | 23.6        |
| N8-Fe            | 28.4                     | 32.6              | 21.2       | 17.8        |
| N10-Fe           | 21.7                     | 27.1              | 28.8       | 22.4        |

**Table S4** NO<sub>3</sub>RR activity comparison of Fe catalyst reported in the literatures.

| Sample                                 | Electrolyte                                                                                   | Yield                                                     | Faradaic Efficiency      | Ref.      |
|----------------------------------------|-----------------------------------------------------------------------------------------------|-----------------------------------------------------------|--------------------------|-----------|
| Fe SAC                                 | 0.1 M K <sub>2</sub> SO <sub>4</sub> +<br>+0.5 M KNO <sub>3</sub>                             | 20 000 μg h <sup>-1</sup> mg <sub>cat</sub> <sup>-1</sup> | NH <sub>3</sub> , ~75%   | [1]       |
| Fe-SAs/g-C <sub>3</sub> N <sub>4</sub> | 0.1 M Na <sub>2</sub> SO <sub>4</sub> +<br>50 mg L <sup>-1</sup> NO <sub>3</sub> <sup>-</sup> | –                                                         | NH <sub>3</sub> , 98.6%  | [2]       |
| Fe SAC                                 | 0.1 M K <sub>2</sub> SO <sub>4</sub> +<br>0.5 M KNO <sub>3</sub>                              | 46 mg h <sup>-1</sup> mg <sub>cat</sub> <sup>-1</sup>     | NH <sub>3</sub> , 92%    | [3]       |
| Fe-Ppy SAC                             | 0.1 M KOH +<br>0.1 M KNO <sub>3</sub>                                                         | 2.75 mg NH <sub>3</sub> h <sup>-1</sup> cm <sup>-2</sup>  | NH <sub>3</sub> , ~100%  | [4]       |
| Ru-SAC                                 | 0.1 M KOH +<br>0.1 M KNO <sub>3</sub>                                                         | 0.69 mmol h <sup>-1</sup> cm <sup>-2</sup>                | NH <sub>3</sub> , 72.8%  | [5]       |
| Fe/Cu-HNG                              | 1 M KOH +<br>0.1 M KNO <sub>3</sub>                                                           | 1.08 mmol h <sup>-1</sup> mg <sup>-1</sup>                | NH <sub>3</sub> , 92.51% | [6]       |
| ISAA In-Pdene                          | 0.5 M Na <sub>2</sub> SO <sub>4</sub> +<br>100 mM NaNO <sub>3</sub>                           | 28.06 mg h <sup>-1</sup> mg <sub>Pd</sub> <sup>-1</sup>   | NH <sub>3</sub> , 87.2%  | [7]       |
| Cu-N-C                                 | 0.1 M KOH +<br>0.1 M KNO <sub>3</sub>                                                         | 4.5 mg cm <sup>-2</sup> h <sup>-1</sup>                   | NH <sub>3</sub> , 84.7%  | [8]       |
| Cu SAC                                 | 0.5 M Na <sub>2</sub> SO <sub>4</sub> +<br>5 mM NO <sub>3</sub> <sup>-</sup>                  | 66 μmol h <sup>-1</sup> cm <sup>-2</sup>                  | NH <sub>3</sub> , 85.5%  | [9]       |
| NGQDs-Fe/G                             | 0.1 M KOH +<br>0.1 M KNO <sub>3</sub>                                                         | 15.9 mmol h <sup>-1</sup> cm <sup>-2</sup>                | NH <sub>3</sub> , 93%    | This work |

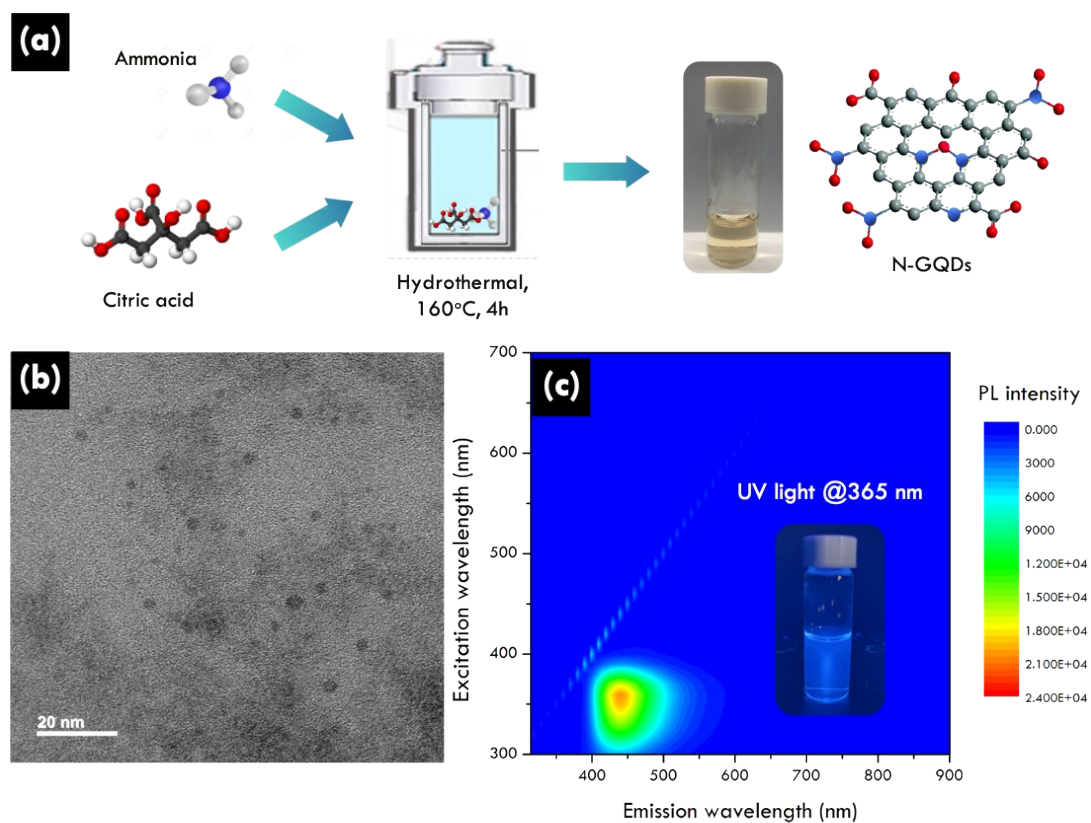

**Figure S1** (a). Illustration of the synthesis process of the N-GQDs, (b). TEM images, and (c). PL excitation-emission-intensity spectra

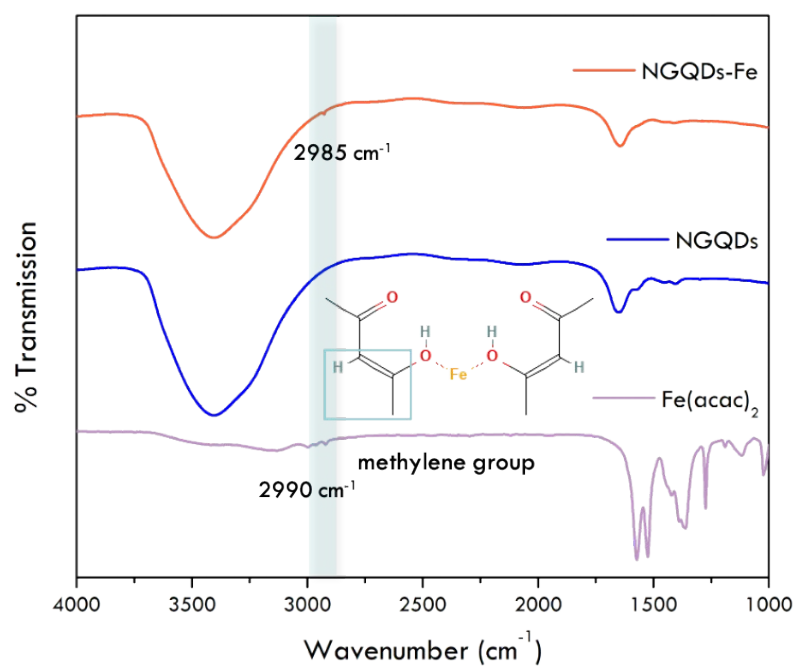

**Figure S2** FTIR spectra of NGQDs, Fe(acac)<sub>2</sub>, and NGQDs-Fe.

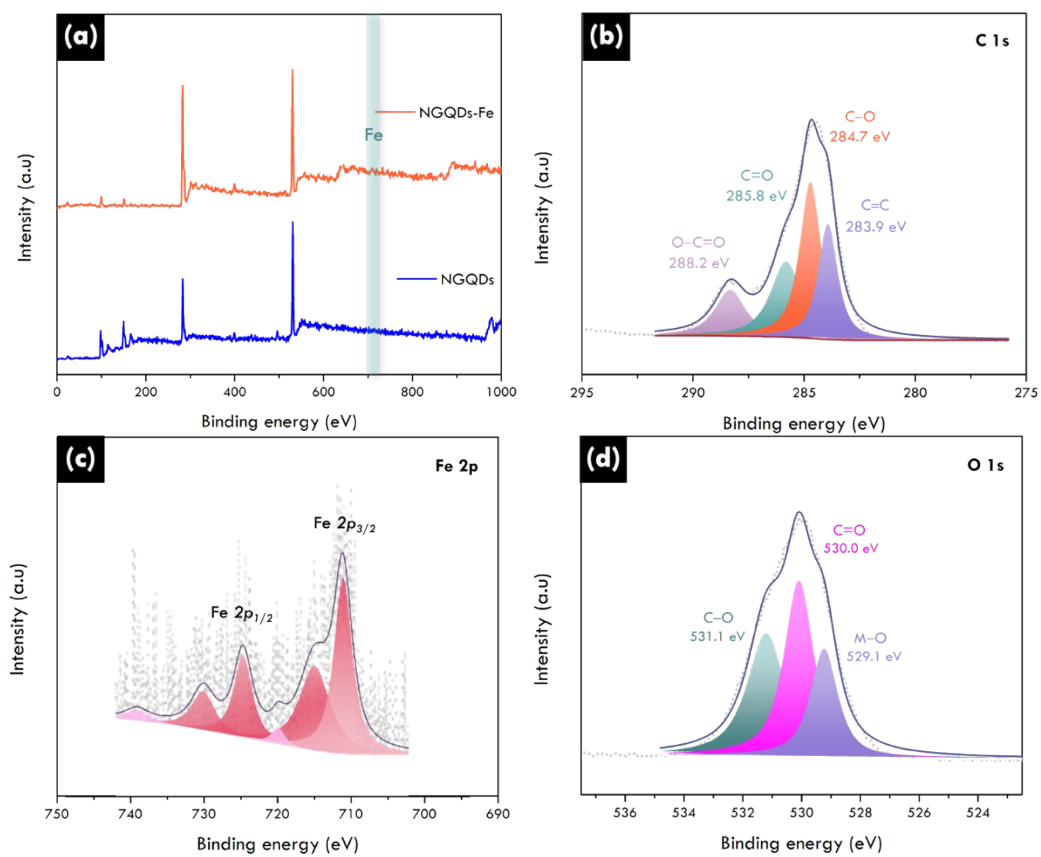

**Figure S3** XPS (a). survey scan spectra, and high resolution spectra of (b). C 1s, (c). Fe 2p, and (d). O 1s of NGQDs-Fe



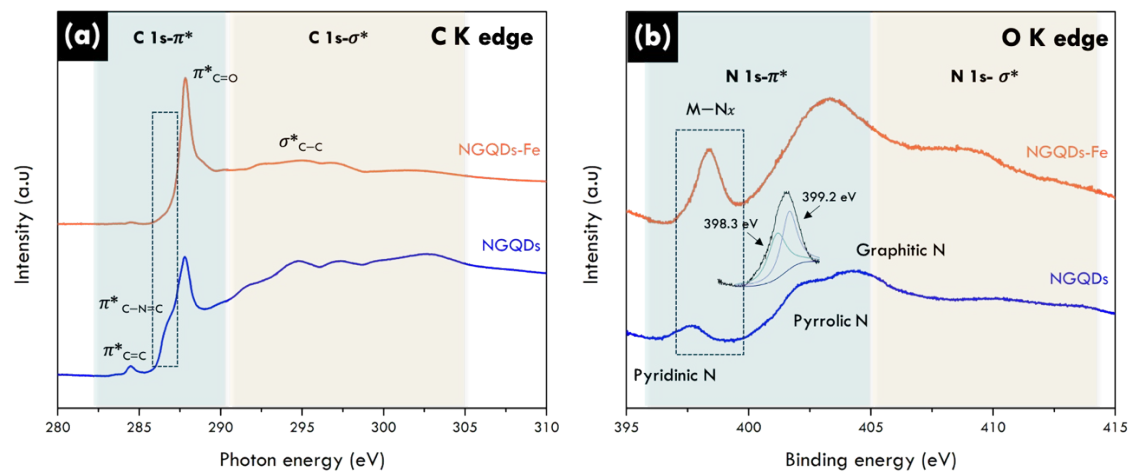

**Figure S4.** X-ray absorption near-edge structure (NEXAFS) spectra of (a). C K edge and (b). O K edge of NGQDs and NGQDs-Fe

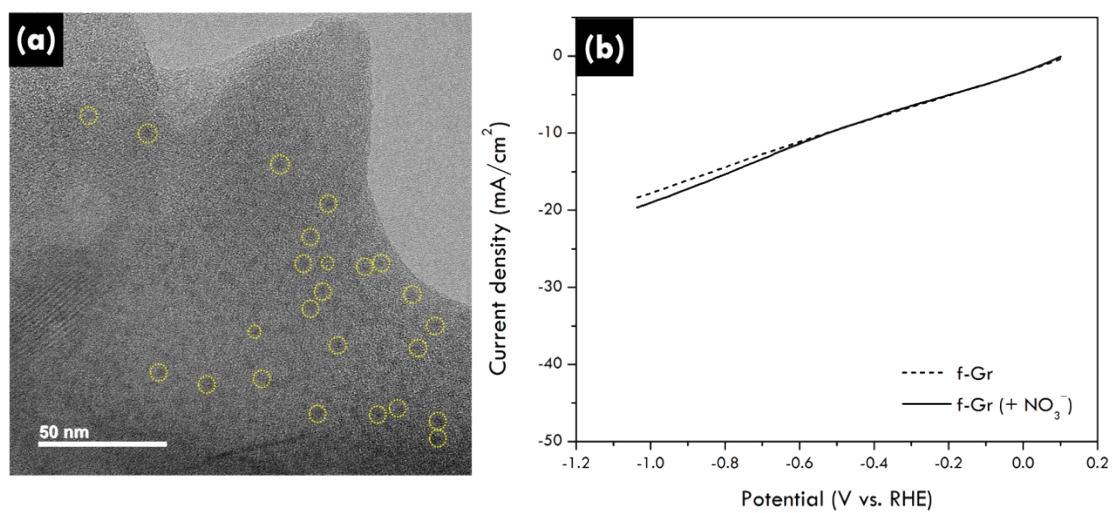

**Figure S5** (a). TEM image of NGQDs-Fe, and (b). NO<sub>3</sub><sup>-</sup>RR polarization curves of the f-Graphene with and without the presence of the NO<sub>3</sub><sup>-</sup> ions.

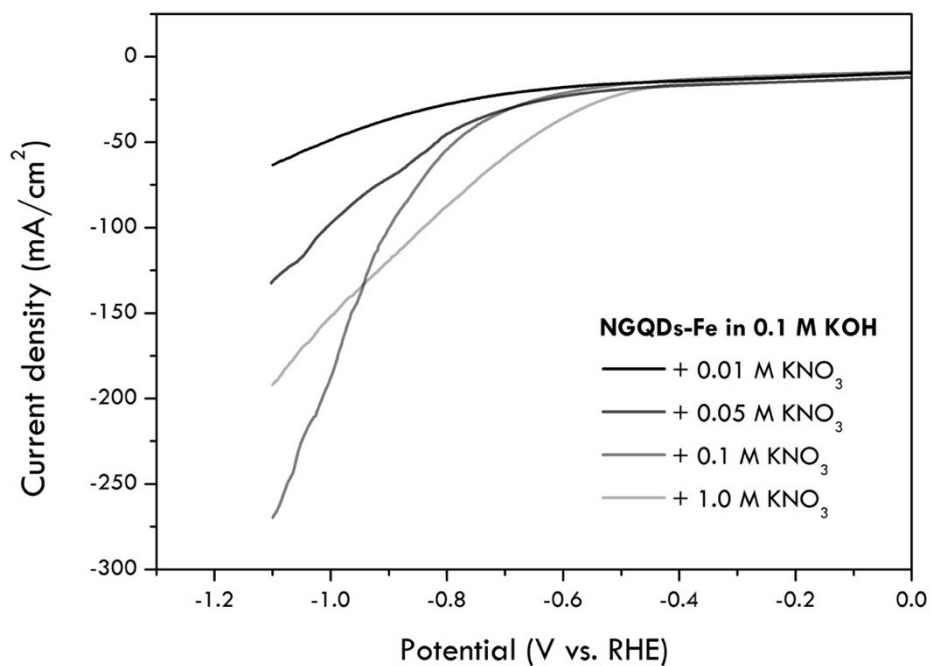

**Figure S6 NO<sub>3</sub><sup>-</sup> optimization.** The polarization curves of the NGQDs-Fe in 0.1 M KOH solution under various KNO<sub>3</sub> concentration.

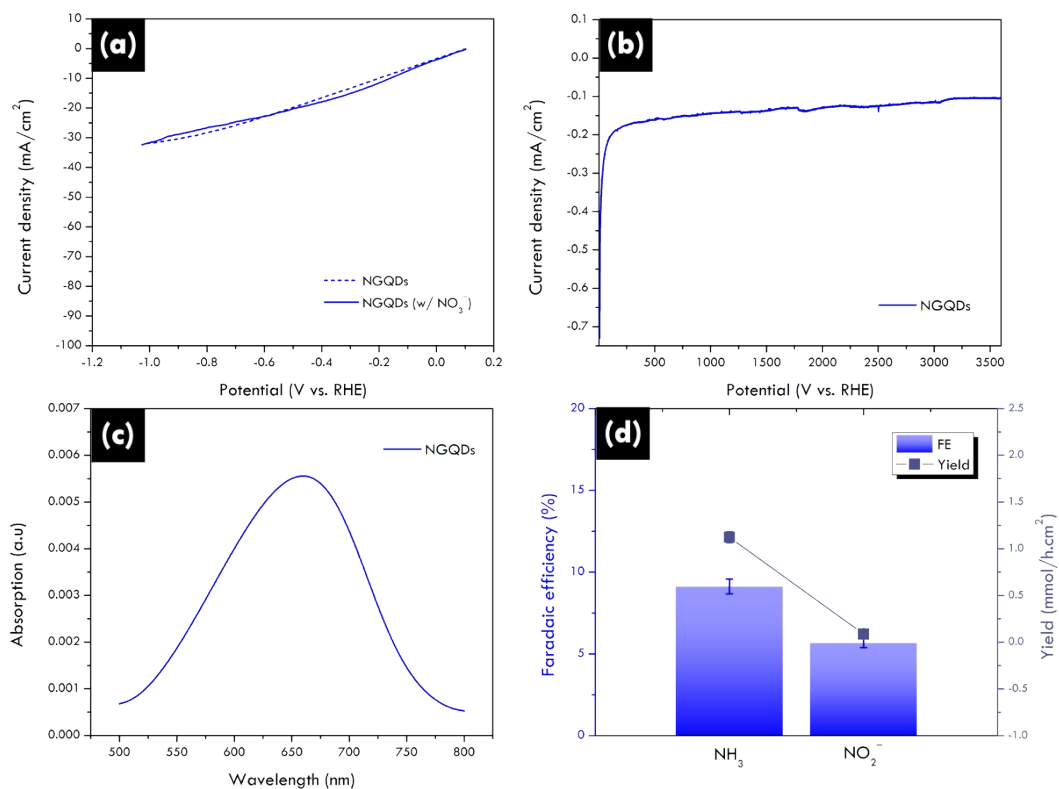

**Figure S7** (a). LSV curves of NGQDs with and without the presence of the NO<sub>3</sub><sup>-</sup> ions, (b). Chronoamperometry curves at potentials of -0.8 V for 1 h in 0.1 M KOH with 0.1 M NO<sub>3</sub><sup>-</sup>, (c). NH<sub>3</sub> UV-Vis absorption spectra of NGQDs, and (d). FE and yield rate of NH<sub>3</sub> and NO<sub>2</sub><sup>-</sup>

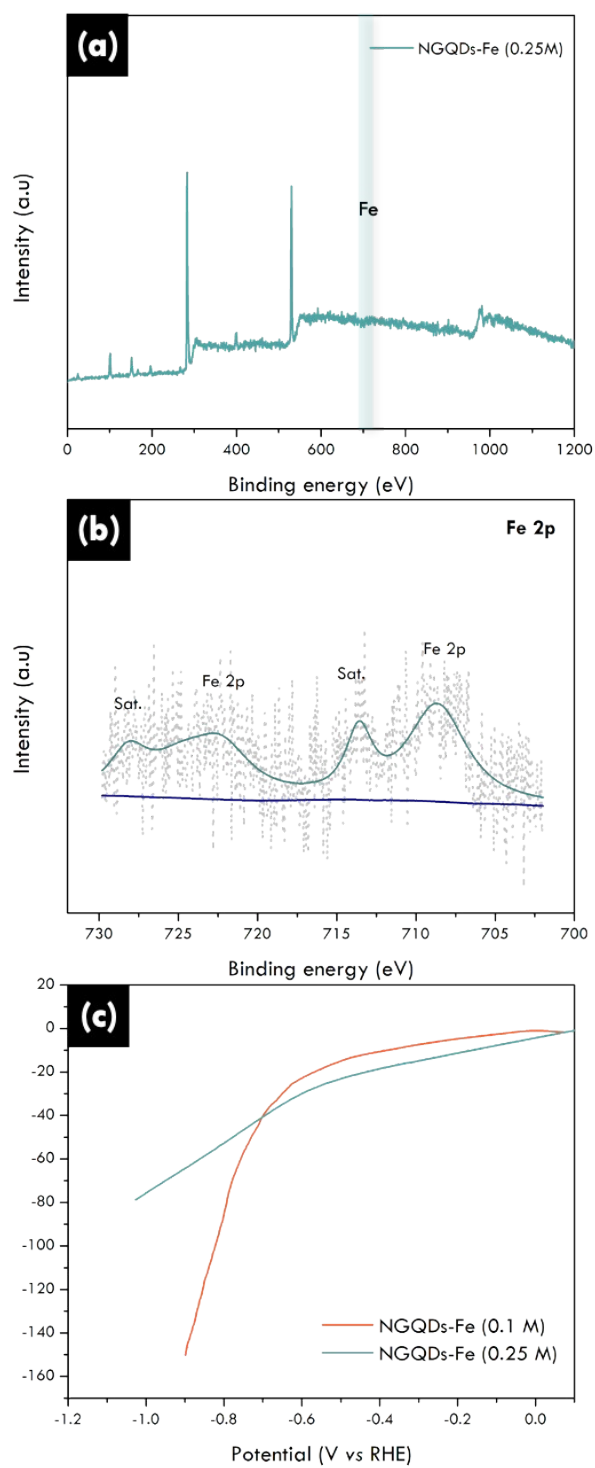

**Figure S8** XPS (a). Full-scan spectra, (b). High-resolution spectra of NGQDs-Fe (0.25 M), and (c). LSV curves of the NGQDs-Fe (0.1 M) and (0.25 M) in 0.1 M KOH with 0.1 M  $\text{NO}_3^-$

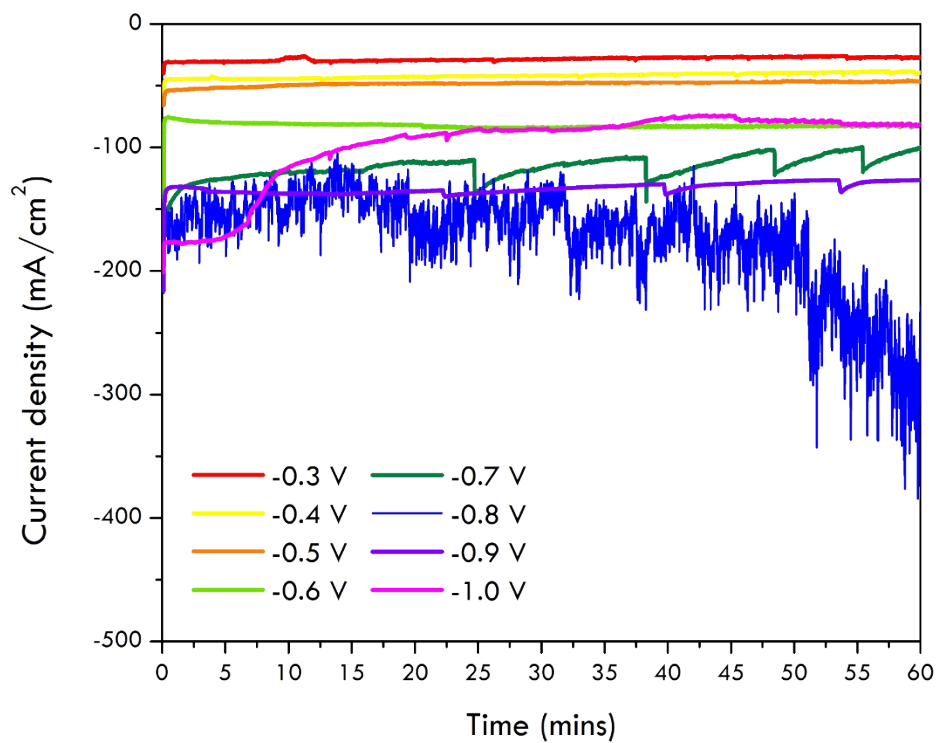

**Figure S9** Chronoamperometry curves of NGQDs-Fe across range of potential for 1 h in 0.1 M KOH with 0.1 M NO<sub>3</sub><sup>-</sup>

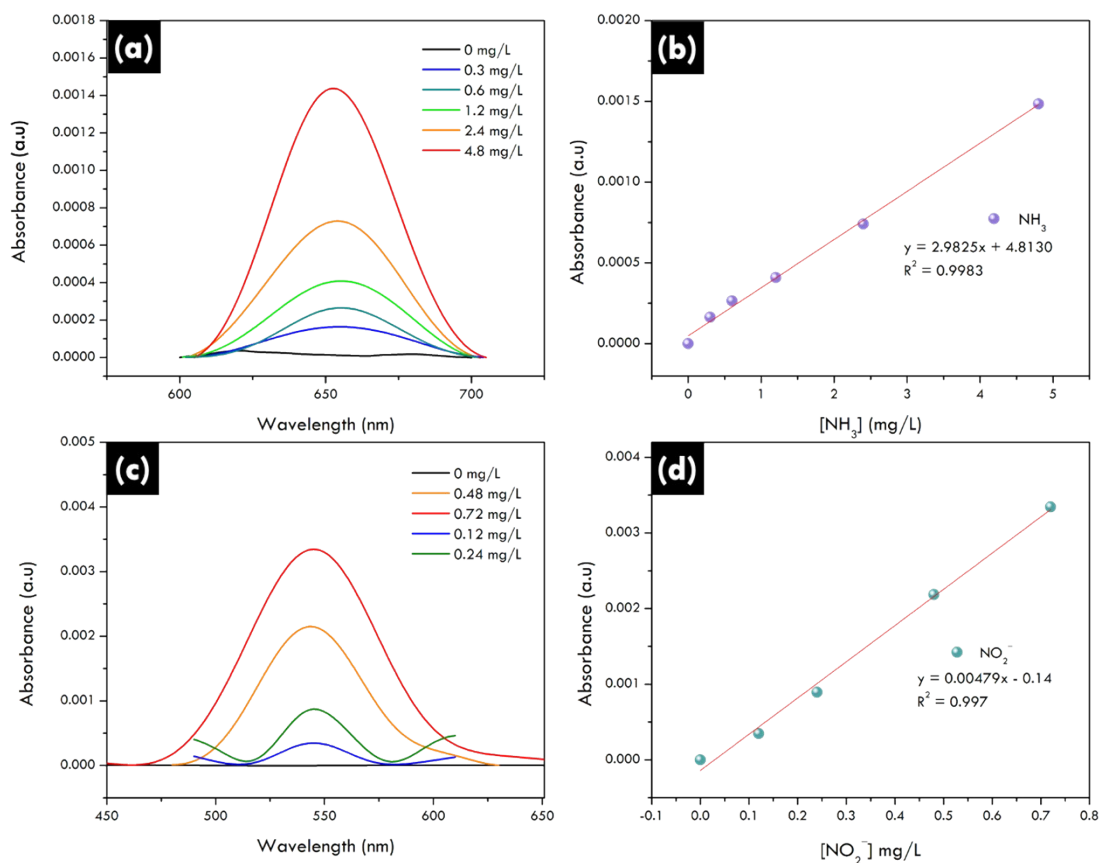

**Figure S10  $\text{NH}_3$  and  $\text{NO}_2^-$  assay using UV-Vis.** (a).  $\text{NH}_3$  absorption spectra of  $\text{NH}_4\text{Cl}$  in different concentration and (b) corresponding calibration curve for  $\text{NH}_3$ . (c).  $\text{NO}_2^-$  absorption spectra of  $\text{NaNO}_2$  in different concentration and (b) corresponding calibration curve for  $\text{NO}_2^-$ .

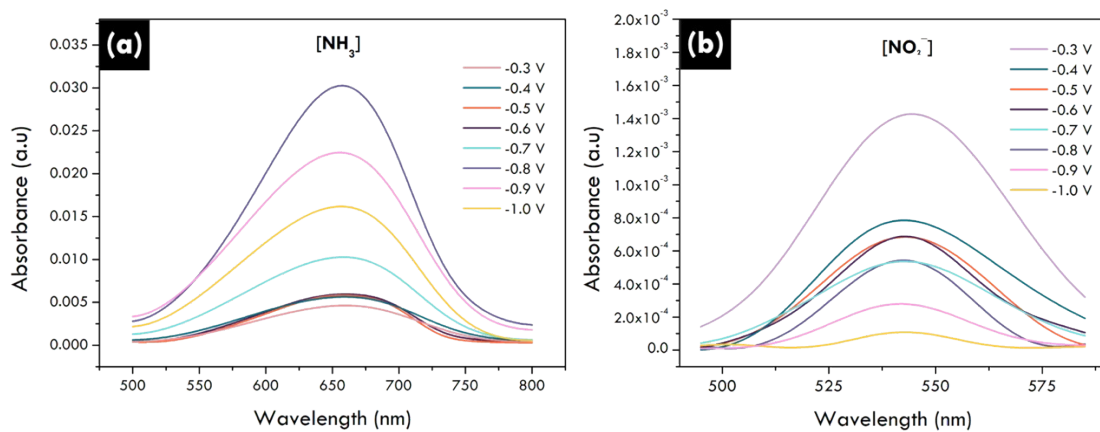

**Figure S11** UV-Vis quantification. (a). NH<sub>3</sub> absorption spectra, and (b). NO<sub>2</sub><sup>-</sup> absorption spectra of NGQDs-Fe across potential, from -0.3 to -1.0 V.



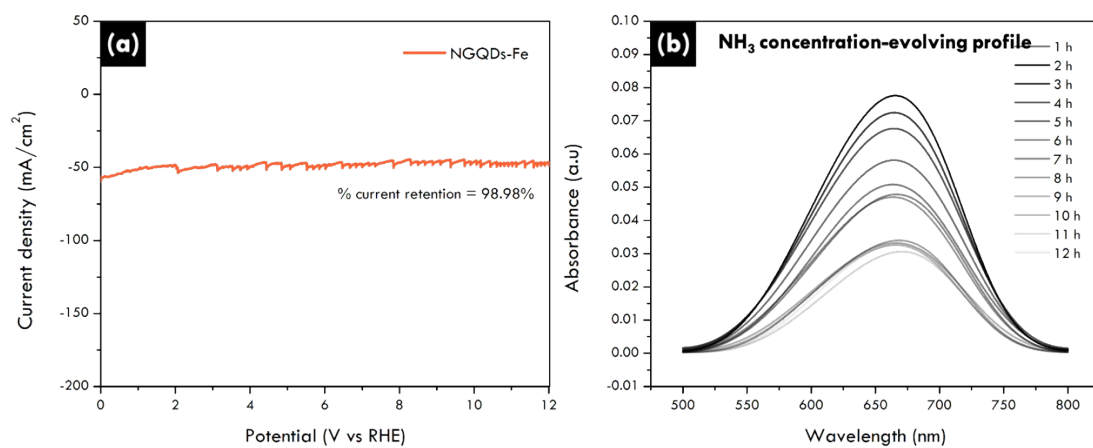

**Figure S12 NH<sub>3</sub> concentration evolving profile** (a). Chronoamperometry curves of NGQDs-Fe in a continuous cycle in 0.1 M KOH with 0.1 M NO<sub>3</sub><sup>-</sup> (b). UV-Vis NH<sub>3</sub> absorption spectra of NGQDs-Fe across cycle

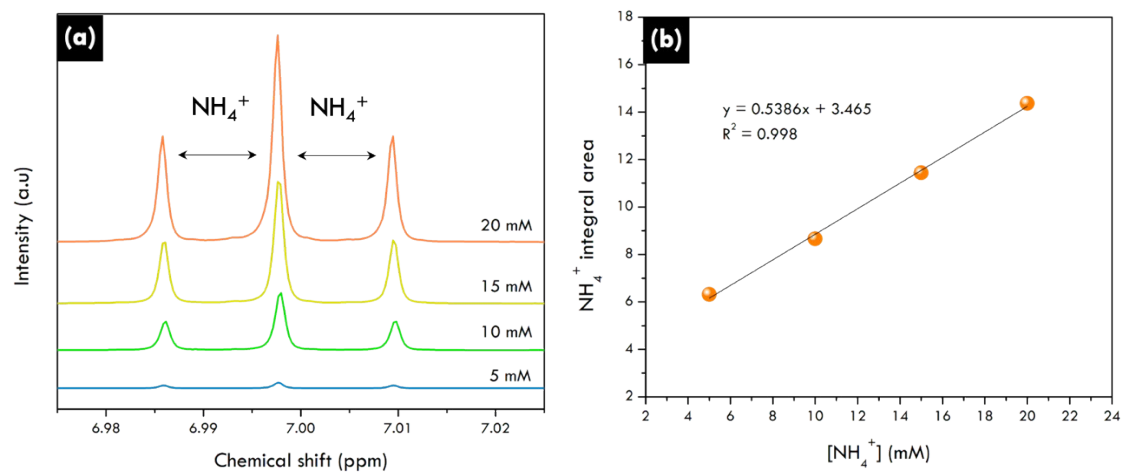

**Figure S13 NH<sub>4</sub><sup>+</sup> quantification using NMR** (a) <sup>1</sup>H NMR spectra of NH<sub>4</sub><sup>+</sup> ions with different concentrations. Maleic acid (fixed concentration) was used as the external standard, (b). corresponding calibration curves

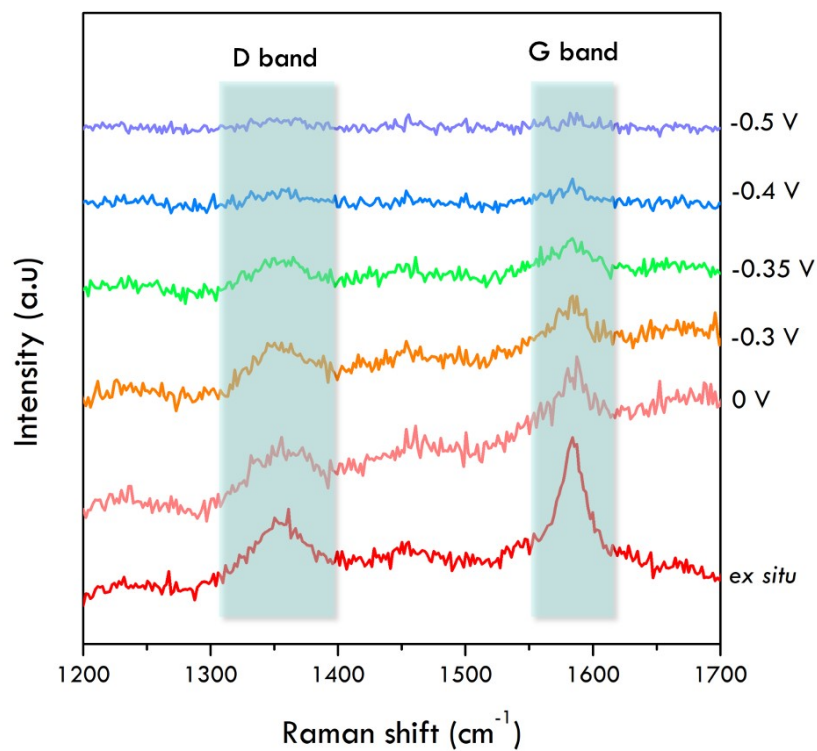

**Figure S14** Enlarged *in situ* Raman spectra of the NGQDs-Fe at a different applied potential under 0.1 M of KOH and 0.1 M  $\text{KNO}_3$

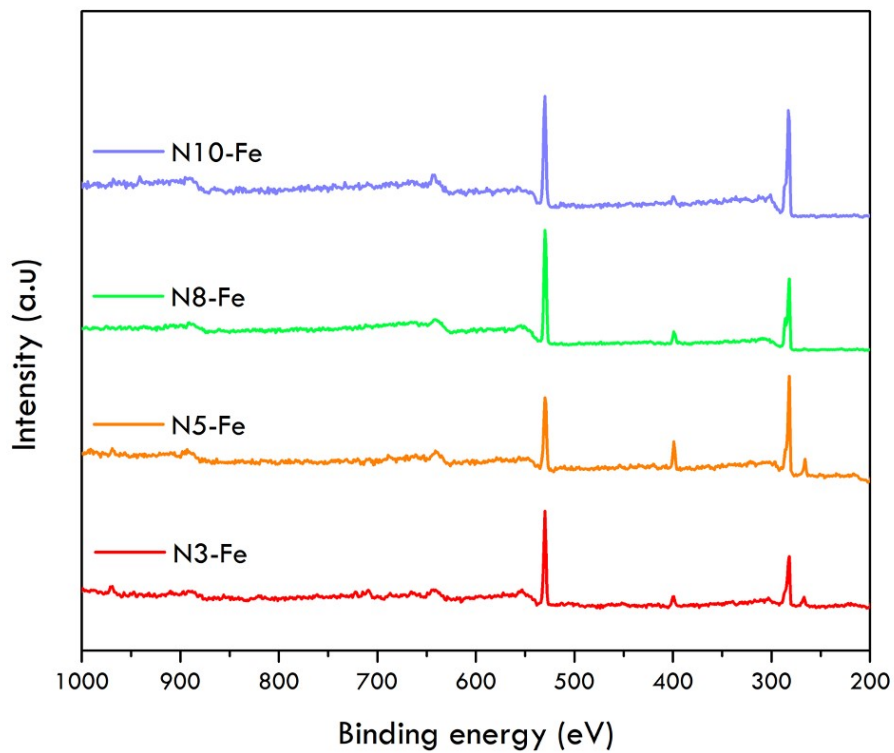

**Figure S15.** XPS full-scan spectra of the as-synthesized N3-Fe, N5-Fe, N8-Fe, and N10-Fe.

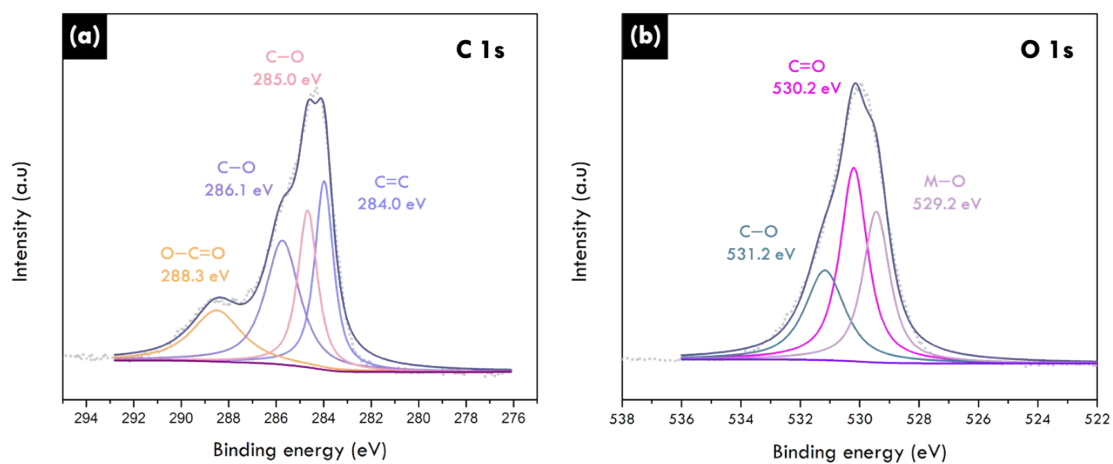

**Figure S16.** XPS core-level spectra of (a) C 1s, and (b) O 1s of N3-Fe.

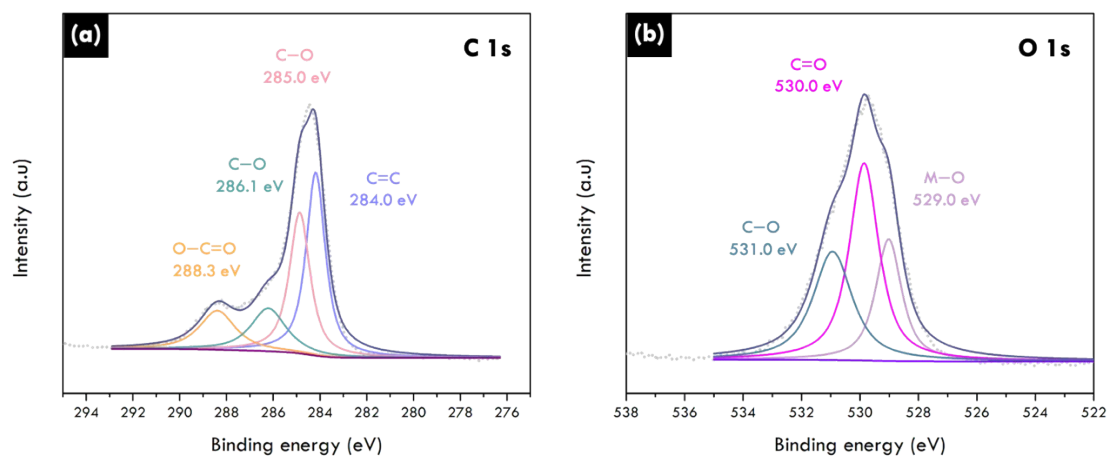

**Figure S17.** XPS core-level spectra of (a) C 1s, and (b) O 1s of N5-Fe.

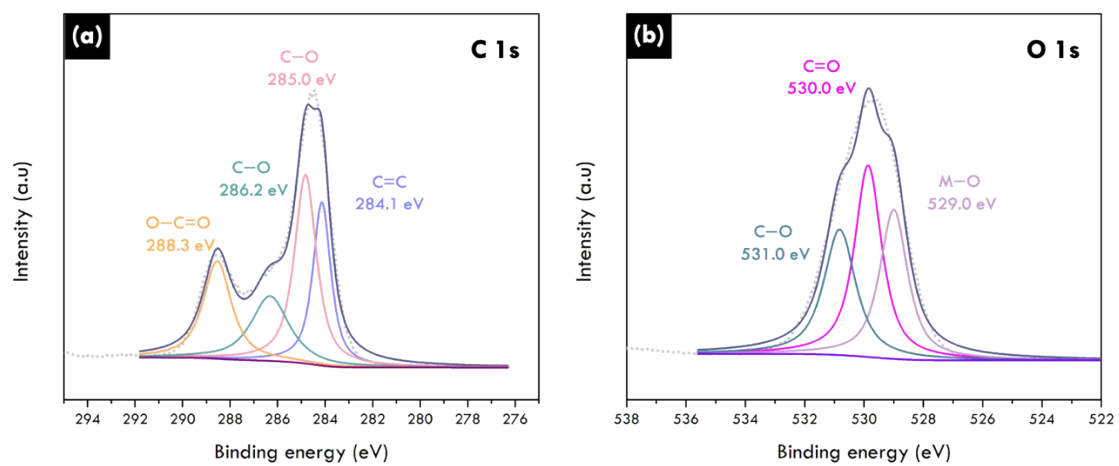

**Figure S18.** XPS core-level spectra of (a) C 1s, and (b) O 1s of N8-Fe.

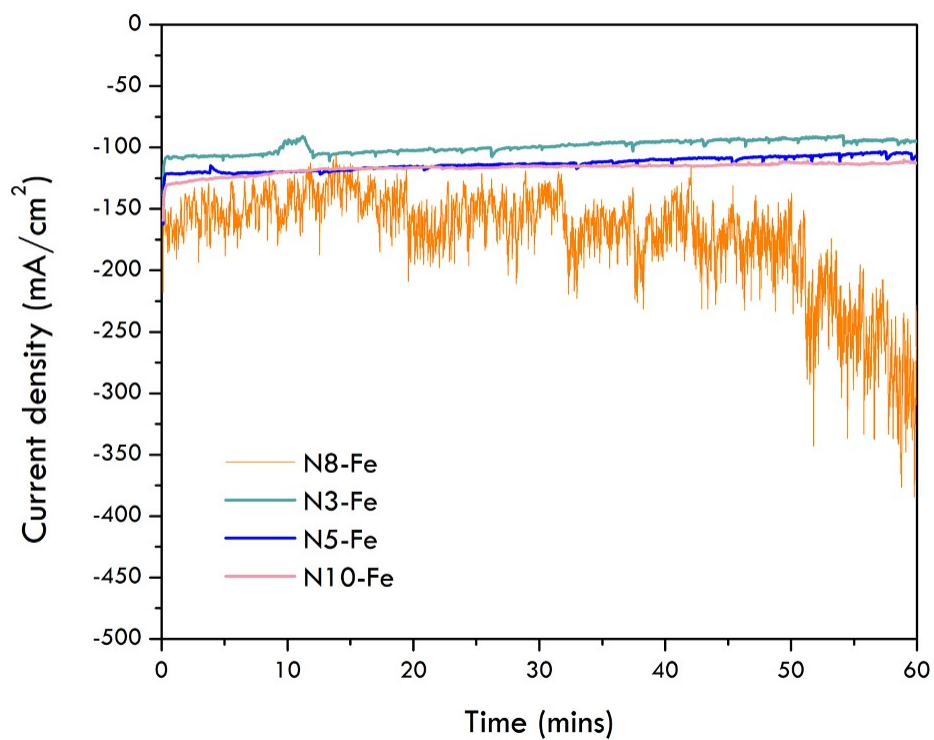

**Figure S19** Chronoamperometry curves of the as-synthesized N3-Fe, N5-Fe, N8-Fe, N10-Fe in 0.1 M KOH with 0.1 M NO<sub>3</sub><sup>-</sup>



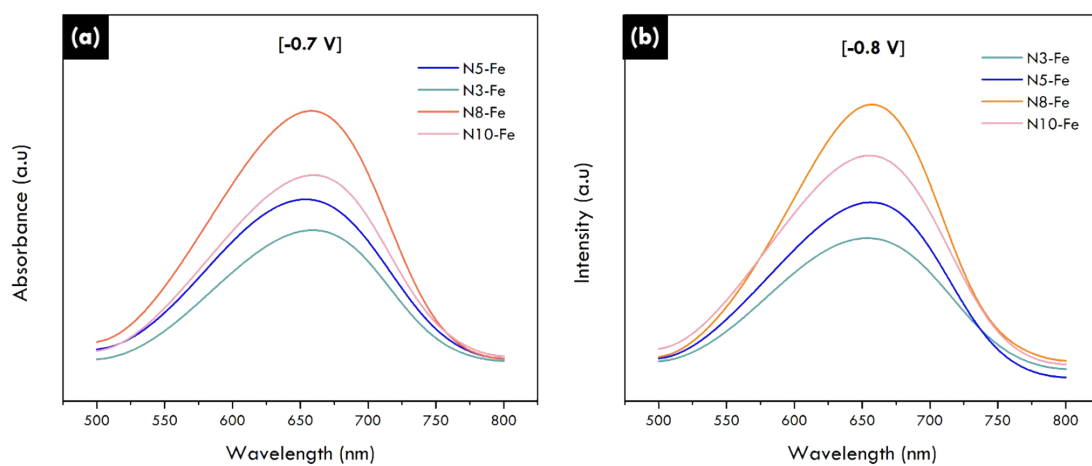

**Figure S20** UV-Vis absorption spectra of  $\text{NH}_3$  at (a)  $-0.7$  V, and (b).  $-0.8$  V applied potential collected from N3-Fe, N5-Fe, N8-Fe, and N10-Fe.

## References

- [1] Z.-Y. Wu, M. Karamad, X. Yong, Q. Huang, D.A. Cullen, P. Zhu, C. Xia, Q. Xiao, M. Shakouri, F.-Y. Chen, J.Y. Kim, Y. Xia, K. Heck, Y. Hu, M.S. Wong, Q. Li, I. Gates, S. Siahrostami, H. Wang, Electrochemical ammonia synthesis via nitrate reduction on Fe single atom catalyst, *Nature Communications* 12(1) (2021) 2870.
- [2] Q. Song, M. Li, X. Hou, J. Li, Z. Dong, S. Zhang, L. Yang, X. Liu, Anchored Fe atoms for NO bond activation to boost electrocatalytic nitrate reduction at low concentrations, *Applied Catalysis B: Environmental* 317 (2022) 121721.
- [3] W.-D. Zhang, H. Dong, L. Zhou, H. Xu, H.-R. Wang, X. Yan, Y. Jiang, J. Zhang, Z.-G. Gu, Fe single-atom catalysts with pre-organized coordination structure for efficient electrochemical nitrate reduction to ammonia, *Applied Catalysis B: Environmental* 317 (2022) 121750.
- [4] P. Li, Z. Jin, Z. Fang, G. Yu, A single-site iron catalyst with preoccupied active centers that achieves selective ammonia electrosynthesis from nitrate, *Energy & Environmental Science* 14(6) (2021) 3522-3531.
- [5] Z. Ke, D. He, X. Yan, W. Hu, N. Williams, H. Kang, X. Pan, J. Huang, J. Gu, X. Xiao, Selective NO<sub>x</sub>- Electroreduction to Ammonia on Isolated Ru Sites, *ACS Nano* 17(4) (2023) 3483-3491.
- [6] S. Zhang, J. Wu, M. Zheng, X. Jin, Z. Shen, Z. Li, Y. Wang, Q. Wang, X. Wang, H. Wei, J. Zhang, P. Wang, S. Zhang, L. Yu, L. Dong, Q. Zhu, H. Zhang, J. Lu, Fe/Cu diatomic catalysts for electrochemical nitrate reduction to ammonia, *Nature Communications* 14(1) (2023) 3634.
- [7] M. Xie, S. Tang, Z. Li, M. Wang, Z. Jin, P. Li, X. Zhan, H. Zhou, G. Yu, Intermetallic Single-Atom Alloy In-Pd Bimetallic for Neutral Electrosynthesis of Ammonia from Nitrate, *Journal of the American Chemical Society* 145(25) (2023) 13957-13967.
- [8] J. Yang, H. Qi, A. Li, X. Liu, X. Yang, S. Zhang, Q. Zhao, Q. Jiang, Y. Su, L. Zhang, J.-F. Li, Z.-Q. Tian, W. Liu, A. Wang, T. Zhang, Potential-Driven Restructuring of Cu Single Atoms to Nanoparticles for Boosting the Electrochemical Reduction of Nitrate to Ammonia, *Journal of the American Chemical Society* 144(27) (2022) 12062-12071.
- [9] Y.-T. Xu, M.-Y. Xie, H. Zhong, Y. Cao, In Situ Clustering of Single-Atom Copper Precatalysts in a Metal-Organic Framework for Efficient Electrocatalytic Nitrate-to-Ammonia Reduction, *ACS Catalysis* 12(14) (2022) 8698-8706.
